# Supplementary material for: Effects of restoration years on soil nitrogen and phosphorus in inland salt marshes
Source: PeerJ. 2024 Jan 16;12:e16766. doi: 10.7717/peerj.16766 (PMC10798150; doi:10.7717/peerj.16766)
Supplement: Supplemental Information 1 [file peerj-12-16766-s001.xlsx]

## Sheet: TN
P.Australis-F	unit：g/kg
Natural-A	1.0474	0.6474	2.5234	3.581	2-A	0.2628	0.1032	0.2534	0.2478	4-A	0.5398	0.6254	0.5148	1.1904	6-A	4.0946	2.5338	4.484	4.8718
Natural-B	1.4036	0.581	0.9482	0.8174	2-B	0.301	0.34	0.1656	0.8544	4-B	0.4058	0.2816	0.297	0.3362	6-B	0.9146	0.9578	1.4594	0.9154
Natural-C	0.1952	0.4202	0.4484	0.4386	2-C	0.4588	0.1444	0.1652	0.2156	4-C	0.228	0.2308	0.206	0.1854	6-C	0.7766	0.7432	0.9212	0.9708
Natural-D	0.1324	0.8154	0.1156	0.2116	2-D	0.1184	0.1244	0.2348	0.2438	4-D	0.1964	0.2462	0.1376	0.132	6-D	0.4304	0.629	0.6044	0.5254
S.triqueter L.-F
Natural-A	1.3994	0.017	0.1042	0.0714	2-A	1.368	0.8976	1.0502	1.611	4-A	0.8664	0.8058	0.3376	0.6726	6-A	1.3364	1.4218	0.6154	2.0178
Natural-B	0.0608	0.0774	0.1108	0.0246	2-B	0.6532	0.8024	0.6388	0.9128	4-B	0.137	0.192	0.138	0.1362	6-B	1.1206	0.6774	2.393	0.5608
Natural-C	0.0196	0.0902	0.1042	0.0746	2-C	0.3256	0.2014	0.0482	0.522	4-C	0.1108	0.1956	0.1008	0.1506	6-C	0.3788	1.1728	1.6842	1.17
Natural-D	0.1344	0.1268	0.063	0.0672	2-D	0.167	0.0344	0.1544	0.092	4-D	0.1388	0.1588	0.0926	0.1138	6-D	0.2542	0.4974	0.7062	0.6204
P.Australis-J
Natural-A	2.6448	2.1618	0.7154	3.1722	2-A	0.0984	0.3456	0.1804	0.103	4-A	0.0854	0.4062	0.2104	0.2186	6-A	0.8054	1.0608	2.179	5.3282
Natural-B	0.8296	0.7114	0.7448	0.7242	2-B	0.194	0.2508	0.1072	0.106	4-B	0.5308	0.126	0.1966	0.014	6-B	0.6426	0.5104	0.5718	0.6188
Natural-C	0.8372	0.6552	0.7908	0.9434	2-C	0.0816	0.1698	0.0968	0.1262	4-C	0.1798	0.1558	0.1912	0.2038	6-C	0.3636	0.3012	0.7906	0.6614
Natural-D	0.7046	0.467	0.4698	0.3108	2-D	0.0836	0.1452	0.0886	0.042	4-D	0.0972	0.1262	0.1402	0.1586	6-D	0.6346	0.4414	0.3702	0.3278
S.triqueter L.-J
Natural-A	0.6236	0.131	0.249	0.344	2-A	1.1172	0.9034	0.6508	1.6348	4-A	0.8064	0.712	0.8122	0.9316	6-A	0.7664	0.109	0.7936	1.2986
Natural-B	0.211	0.4776	0.3666	0.176	2-B	0.8392	0.9924	1.1386	0.866	4-B	0.1914	0.2186	0.2352	0.22	6-B	0.9544	1.3778	0.8288	0.993
Natural-C	0.475	0.2202	0.1108	0.1204	2-C	0.104	0.3138	0.9132	0.7036	4-C	0.1984	0.1368	0.1934	0.19	6-C	1.0908	0.6022	0.2442	0.367
Natural-D	2.4818	0.1328	0.1134	0.043	2-D	0.1952	0.2906	0.3198	0.439	4-D	0.0998	0.2252	0.1642	0.0104	6-D	1.5424	0.0704	0.2174	0.1466
P.Australis-S
Natural-A	3.0488	1.6618	4.7576	2.9728	2-A	0.2628	0.1002	0.222	0.326	4-A	0.8804	2.9978	1.2872	2.5156	6-A	2.7044	3.2842	0.8002	2.1532
Natural-B	0.639	0.76	0.8706	0.5482	2-B	0.0294	0.0562	0.0976	0.058	4-B	0.411	0.635	1.24	0.5966	6-B	0.4926	0.6768	0.4096	0.519
Natural-C	0.4624	0.476	0.5942	0.6088	2-C	0.145	0.134	0.1248	0.1086	4-C	0.5362	0.4384	0.4356	0.5442	6-C	0.6964	0.9168	0.6216	0.6318
Natural-D	0.3194	0.2962	0.4416	0.7546	2-D	0.0252	0.1068	0.1032	0.0828	4-D	0.4736	0.3972	0.4444	0.4324	6-D	0.5466	0.4824	0.5678	0.5176
S.triqueter L.-S
Natural-A	0.1702	0.0106	0.1408	0.1008	2-A	2.4402	1.0434	1.0158	1.005	4-A	0.6972	0.5766	0.7214	0.8316	6-A	0.7732	0.5736	1.0204	0.5596
Natural-B	0.1662	0.1244	0.1032	0.0554	2-B	1.151	0.7368	0.8216	1.219	4-B	0.456	0.8668	0.783	0.8556	6-B	1.0954	0.3762	0.3848	0.3626
Natural-C	0.0142	0.0314	0.4036	0.1386	2-C	0.1056	0.3382	0.4644	0.8984	4-C	0.245	0.2202	0.5472	0.3812	6-C	0.5246	0.3134	0.2448	0.382
Natural-D	0.0768	0.176	0.0514	0.1426	2-D	0.087	0.2226	0.1124	0.478	4-D	0.1388	0.3034	0.3518	0.3136	6-D	0.5072	0.3132	0.168	0.3306

## Sheet: TP
P.Australis-F
Natural-A	0.2884	0.2958	0.4904	0.4092	2-A	0.1174	0.2466	0.1136	0.161	4-A	0.167	0.204	0.3892	0.2562	6-A	0.1028	0.2416	0.1574	0.1004
Natural-B	0.2344	0.2468	0.2316	0.223	2-B	0.1672	0.1542	0.159	0.1102	4-B	0.1608	0.1232	0.1964	0.2054	6-B	0.2374	0.153	0.0812	0.0936
Natural-C	0.159	0.1678	0.1522	0.1524	2-C	0.169	0.1444	0.1322	0.1196	4-C	0.1158	0.107	0.1598	0.1812	6-C	0.092	0.1176	0.1798	0.277
Natural-D	0.1028	0.19	0.0806	0.1382	2-D	0.1524	0.1354	0.1488	0.2278	4-D	0.107	0.1144	0.1342	0.1502	6-D	0.0872	0.1202	0.1186	0.1408
S.triqueter L.-F
Natural-A	0.4062	0.1156	0.0844	0.088	2-A	0.2648	0.212	0.2852	0.3504	4-A	0.2984	0.2792	0.1742	0.2334	6-A	0.3464	0.4092	0.2146	0.4234
Natural-B	0.1282	0.1224	0.1156	0.1056	2-B	0.1942	0.2614	0.2392	0.2846	4-B	0.1554	0.1294	0.1492	0.1272	6-B	0.3476	0.2406	0.4526	0.2444
Natural-C	0.1148	0.1022	0.1168	0.1044	2-C	0.168	0.1642	0.073	0.1974	4-C	0.137	0.175	0.1234	0.1562	6-C	0.2188	0.3442	0.4184	0.1138
Natural-D	0.1888	0.1106	0.108	0.0922	2-D	0.1292	0.0912	0.111	0.1008	4-D	0.1572	0.1498	0.1466	0.142	6-D	0.1894	0.2404	0.2666	0.291
P.Australis-J
Natural-A	0.0612	0.1984	0.2082	0.1726	2-A	0.216	0.1946	0.1896	0.2346	4-A	0.235	0.1106	0.1176	0.1956	6-A	0.1952	0.0948	0.1542	0.084
Natural-B	0.0322	0.192	0.1328	0.1052	2-B	0.1984	0.2046	0.1706	0.1746	4-B	0.1422	0.0938	0.2148	0.1146	6-B	0.1548	0.1052	0.1488	0.1054
Natural-C	0.2496	0.283	0.3404	0.5006	2-C	0.2904	0.289	0.212	0.3476	4-C	0.0872	0.0858	0.1264	0.0842	6-C	0.1048	0.0696	0.139	0.1044
Natural-D	0.1378	0.1824	0.2126	0.2046	2-D	0.1794	0.1734	0.2122	0.1744	4-D	0.082	0.081	0.093	0.0788	6-D	0.0726	0.0658	0.1296	0.0812
S.triqueter L.-J
Natural-A	0.287	0.285	0.1906	0.2436	2-A	0.2882	0.2552	0.4114	0.3108	4-A	0.233	0.2648	0.2596	0.3238	6-A	0.2766	0.3302	0.2534	0.2622
Natural-B	0.1892	0.2414	0.207	0.163	2-B	0.2554	0.2814	0.3148	0.2656	4-B	0.1762	0.1948	0.17	0.199	6-B	0.3342	0.355	0.2834	0.2776
Natural-C	0.1778	0.1754	0.1438	0.157	2-C	0.1646	0.154	0.2736	0.2328	4-C	0.1832	0.1366	0.1512	0.1198	6-C	0.2634	0.2508	0.1894	0.179
Natural-D	0.1786	0.162	0.1534	0.1672	2-D	0.1394	0.1516	0.1924	0.187	4-D	0.1374	0.1308	0.1314	0.1394	6-D	0.1648	0.1382	0.1546	0.1664
P.Australis-S
Natural-A	0.1848	0.3504	0.3954	0.3842	2-A	0.1628	0.132	0.1492	0.1392	4-A	0.1664	0.319	0.2128	0.1704	6-A	0.365	0.3358	0.1654	0.2338
Natural-B	0.122	0.0854	0.1598	0.1598	2-B	0.172	0.1376	0.0984	0.0938	4-B	0.1314	0.1368	0.1992	0.1796	6-B	0.15	0.1528	0.1832	0.107
Natural-C	0.1276	0.1	0.193	0.2192	2-C	0.1184	0.095	0.0984	0.0938	4-C	0.1406	0.1584	0.1474	0.1762	6-C	0.1792	0.182	0.1768	0.178
Natural-D	0.0754	0.0778	0.1714	0.1964	2-D	0.0858	0.0774	0.0864	0.0878	4-D	0.1378	0.1516	0.1524	0.1762	6-D	0.1826	0.1682	0.158	0.1544
S.triqueter L.-S
Natural-A	0.1336	0.1228	0.117	0.1062	2-A	0.4738	0.3432	0.343	0.2846	4-A	0.2518	0.1936	0.2534	0.3488	6-A	0.2874	0.2056	0.2396	0.209
Natural-B	0.131	0.156	0.1698	0.1232	2-B	0.325	0.2896	0.2696	0.3484	4-B	0.2298	0.2558	0.2934	0.3474	6-B	0.3274	0.1624	0.1778	0.202
Natural-C	0.134	0.112	0.1402	0.1204	2-C	0.1048	0.2256	0.2006	0.3236	4-C	0.1896	0.195	0.2548	0.241	6-C	0.2368	0.1532	0.1668	0.1864
Natural-D	0.121	0.1446	0.1112	0.1466	2-D	0.1222	0.1808	0.1554	0.2032	4-D	0.1768	0.1882	0.185	0.2404	6-D	0.1964	0.1414	0.1432	0.1776
